# Supplementary material
Source: Royal Society of Chemistry journal article supplement (doi:10.1039/d6dt00634e)
Supplement: d6dt00634e1.pdf [file d6dt00634e1.pdf]

Electronic supporting information

# Pre-constructed multi-peroxotungstic centers for highly efficient and recyclable organophosphorus-tungstic catalysts in styrene epoxidation

Chang Xu<sup>a,b</sup>, Yuequn Li<sup>a,b</sup>, Lin Tang<sup>a,b</sup>, Weiqiang Yuan<sup>a,c</sup>, Wenxi Chen<sup>c</sup>, Jingjing Chen<sup>a,b\*</sup>,  
Haohong Li<sup>a,d\*</sup>, Huidong Zheng<sup>a,b\*</sup>

<sup>a</sup>Engineering Research Center of Advanced Manufacturing Technology for Fine Chemicals (Fujian Province University), College of Chemical Engineering, Fuzhou University, Fuzhou, Fujian, 350108, China

<sup>b</sup>Qingyuan Innovation Laboratory, Quanzhou, Fujian, 362801, China

<sup>c</sup>Huazhi Engineering Technology Co., LTD. Fuzhou, Fujian, 350108, China

<sup>d</sup>College of Chemistry, Fuzhou University, Fuzhou, Fujian, 350108, China

\*Corresponding authors: jing\_chem@fzu.edu.cn (J. Chen), youngman@fzu.edu.cn (H. Zheng)

## 1. Experimental section

### 1.1 Reagents and characterization

The chemicals used in this work, including phenylphosphonic acid ( $\text{PhP}=\text{O}(\text{OH})_2$ ) (AR), *p*-xylylenebisphosphonic acid ( $\text{Ph}(p\text{-CH}_2\text{P}=\text{O}(\text{OH})_2)_2$ , 97%),  $\text{H}_3\text{PO}_4$  (85%),  $(\text{C}_{16}\text{H}_{33})(\text{CH}_3)_3\text{N}\cdot\text{Br}$  (HTMA $\cdot\text{Br}$ ) (AR),  $(\text{C}_{18}\text{H}_{37})_2(\text{CH}_3)_2\text{N}\cdot\text{Cl}$  (DMDOA $\cdot\text{Cl}$ ) (AR),  $\text{Na}_2\text{SO}_4$  (99%),  $\text{Na}_2\text{WO}_4$  (98%),  $\text{H}_2\text{O}_2$  (30%), styrene (98%), limonene (95%), 1-octene (99%), cyclohexene (98%), cyclooctene (99%), styrene oxide (99%), toluene (AR), ethyl acetate (AR), N, N-dimethylformamide (DMF, AR),  $\text{C}_2\text{H}_4\text{Cl}_2$  (AR) and  $\text{CHCl}_3$  (AR) were obtained from commercial resource and used without further purification.

FT-IR spectra were recorded on a Thermo Scientific Nicolet iS50 spectrophotometer in the range of 400–4000  $\text{cm}^{-1}$  via KBr model. Raman spectra were analyzed on a Renishaw OPTIMA 8000 in the range of 200~1000 nm. Elemental analysis of C, H, N, O were obtained from a

Elementar Vario EL cube apparatus. P and W contents were determined by a Thermo CAP7400 ICP spectrometer.  $^1\text{H}$ ,  $^{13}\text{C}$  and  $^{31}\text{P}$  NMR spectra were recorded on a Bruker DRK-400 apparatus in  $\text{CDCl}_3$ . X-ray diffraction (XRD) patterns were obtained on a Philips X'Pert-MPD diffractometer (Cu  $\text{K}\alpha$  radiation,  $\lambda=1.54056 \text{ \AA}$ ) in the scanning range of  $5\sim 60^\circ$ . X-ray photoelectron spectroscopy (XPS) were measured through the Thermo Fisher Scientific ESCALAB 250X system. The element mapping of catalysts was scanned by ultra-high-resolution SEM (Helios G4 CX). The concentrations in the reacting system were determined by a gas chromatograph (GC-2014C) equipped with an InerCap-5 capillary column. And the qualitative analysis of the products and by-products were performed by a GC-MSQP2020 NX GC-MS equipped with a Rtx-5MS column.

## 1.2 Catalysts preparation

$[(\text{C}_{16}\text{H}_{33})(\text{CH}_3)_3\text{N}]_2\cdot\{\text{PhPO}_3[\text{W}=\text{O}(\text{O}_2)_2]_2\}$  (labelled as **Ph-PW<sub>2</sub>**) : **Ph-PW<sub>2</sub>** was prepared by reference of literature method (Scheme S1).<sup>S1</sup> In a 50 mL three-neck flask,  $\text{Na}_2\text{WO}_4$  (5.9 g, 20 mmol) was dissolved in 10 mL deionized water, then  $\text{HCl}$  (2 g, 20 mmol, 36%) was dropped. The mixture was stirred for 5 min at  $35^\circ\text{C}$  to produce yellow solids.  $\text{H}_2\text{O}_2$  (9.1 g, 80 mmol, 30 wt%) was added at  $55^\circ\text{C}$  and stirred for 10 min, during which the yellow precipitation was dissolved to obtained yellow transparent solution. In another flask, phenylphosphonic acid (0.8 g, 5 mmol) and  $(\text{C}_{16}\text{H}_{33})(\text{CH}_3)_3\text{N}\cdot\text{Br}$  (3.65 g, 5 mmol) were dissolved in 100 mL deionized water under ultrasound. The latter solution was added into the former yellow solution and stirred for 1h at 600 rpm to yield yellow precipitation. The solids were separated by centrifuged, which were washed with water and dried under vacuum for 12 h. Yield: 5.0 g, 79.87% based on W. IR (KBr,  $\text{cm}^{-1}$ , Fig. S1a): 3438(s), 2920(s), 2850(s), 2360(w), 1629(m), 1487(s), 1469(s), 1146(s), 1126(m), 1051(s), 940(s), 907(s), 820(m), 729(s), 705(s), 594(w), 562(m). Elemental analysis: Cal. C 42.18%; H 7.16%; N 2.24%; O 16.60%; P 2.47%; W 29.35%; found: C 40.24%; H 7.01%; N 2.12%; O 15.61%; P 2.91%; W 32.11%.

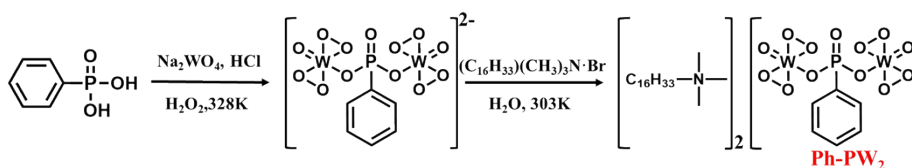

Scheme S1 Synthetic procedure for the catalyst **Ph-PW<sub>2</sub>**

$[(\text{C}_{16}\text{H}_{33})(\text{CH}_3)_3\text{N}]_4\cdot\text{Ph}\{\text{CH}_2\text{PO}_3[\text{W}=\text{O}(\text{O}_2)_2]_2\}_2$  (labelled as **Ph-P<sub>2</sub>W<sub>4</sub>**): **Ph-P<sub>2</sub>W<sub>4</sub>** was synthesized

via the same procedure with that of Ph-PW<sub>2</sub> (Scheme S2), except that phenylphosphonic acid was replaced by *p*-xylylenebisphosphonic acid (0.66 g, 2.5 mmol). Yellow solids (4.6 g) were obtained with yield of 74.92% based on W. IR (KBr, cm<sup>-1</sup>, Fig. S1b): 3453(s), 2923(s), 2850(s), 2363(s), 2330(m), 1645(s), 1489(s), 1472(s), 1263(s), 1103(m), 1050(m), 950(s), 861(m), 804(s), 720(w), 701(w), 616(w), 585(w), 555(m). Elemental analysis: Cal. C 41.09%; H 7.22%; N 2.28%; O 16.94%; P 2.52%; W 29.95%; found: C 40.88%; H 7.53%; N 2.65%; O 17.16%; P 2.33%; W 29.45%.

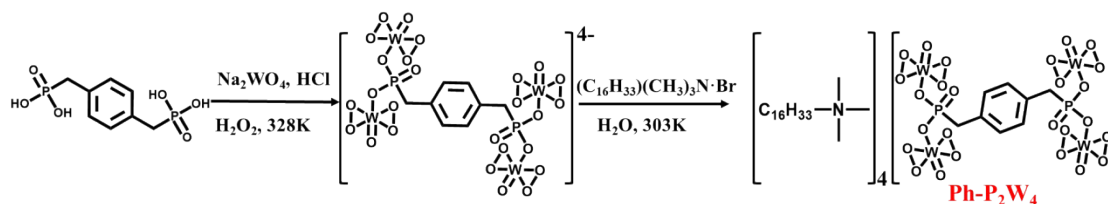

Scheme S2 Synthetic procedure for the catalyst Ph-P<sub>2</sub>W<sub>4</sub>

[(C<sub>18</sub>H<sub>37</sub>)<sub>2</sub>(CH<sub>3</sub>)<sub>2</sub>N]<sub>3</sub>·PO<sub>4</sub>[WO(O<sub>2</sub>)<sub>2</sub>]<sub>4</sub> (labelled as DMDOA-PW<sub>4</sub>): DMDOA-PW<sub>4</sub> was prepared according to literature method.<sup>S2</sup> Firstly, in a 100 mL three-neck flask, Na<sub>2</sub>WO<sub>4</sub> (5.9 g, 20 mmol) was dissolved in 15 mL H<sub>2</sub>O to obtain clear solution, into which HCl (4.05 g, 40 mmol, 36%) was dropped. This mixture was stirred for 5 min at 35°C and then heated to 55°C, at this temperature H<sub>2</sub>O<sub>2</sub> (15.88 g, 140 mmol) was added. The obtained yellow-green suspension was stirred for 30 min and centrifuged at rate of 8000 rpm for 5 min. The supernatant was moved into 85 mL H<sub>3</sub>PO<sub>4</sub> aqueous solution (H<sub>3</sub>PO<sub>4</sub>: 5 mmol, 0.58 g H<sub>3</sub>PO<sub>4</sub>) and kept stirring of 10 min. 50 mL CH<sub>2</sub>Cl<sub>2</sub> containing (C<sub>18</sub>H<sub>37</sub>)<sub>2</sub>(CH<sub>3</sub>)<sub>2</sub>N·Cl (8.80 g, 15 mmol) was added dropwise into the above yellow-green solution. The resultant emulsion was stirred for 1h at 600 rpm at room temperature. Finally, the organic phase was separated to obtain bright yellow-green solution. CHCl<sub>2</sub> was removed by rotating evaporation at 30–40°C to yield the yellow-green powders, which was labelled as DMDOA-PW<sub>4</sub>. Yield: 12.20g, 87.02%. IR (KBr, cm<sup>-1</sup>, Fig. S1b): 3440(s), 2920(s), 2850(s), 2363(w), 2330(w), 1640(m), 1470(s), 1370(m), 1080(s), 953(s), 885(m), 819(m), 804(s), 720(s), 608(w), 550(m).

### 2.3 Styrene epoxidation reaction

In a 50 mL flask, styrene (2.1 g, 20 mmol) and catalyst Ph-PW<sub>2</sub> (0.5 g, 0.4 mmol) were dissolved in 8 mL CHCl<sub>3</sub>, and the solution was heated to 40°C. After catalyst was dissolved completely, 30% H<sub>2</sub>O<sub>2</sub> (2.3 g, 20 mmol) aqueous solution containing Na<sub>2</sub>SO<sub>4</sub> (0.85 g, 6 mmol) was

added dropwise and kept reacting for 2h, during which the elevating temperature must be controlled by cooling water. CHCl<sub>3</sub> was eliminated in the solvent-free reaction, during which styrene acted as not only solvent but also reactant. The usage of H<sub>2</sub>O<sub>2</sub> and Na<sub>2</sub>SO<sub>4</sub> were half amount of solvent-present ones. The products were extracted from reaction system at certain intervals, which was separated by centrifugation and toluene was used as internal standard for GC-MS analysis. H<sub>2</sub>O<sub>2</sub> concentration during the reaction was determined by iodometric titration method. The styrene conversion (X<sub>1</sub>), conversion in solvent-free reaction (X<sub>2</sub>), styrene epoxide yield (Y), selectivity (S) in organic solvents and concentration of H<sub>2</sub>O<sub>2</sub> were defined as follows:

$$X_1 = \frac{C_{\text{styrene}^*} - C_{\text{styrene}}}{C_{\text{styrene}^*}} \times 100\% \quad Y = \frac{C_{\text{epoxide}}}{C_{\text{epoxide}^*}} \times 100\% \quad S = \frac{Y}{X_1} \times 100\%$$

$$X_2 = \frac{M_{\text{styrene}^*} - M_{\text{styrene}}}{M_{\text{hydrogen peroxide}^*}} \times 100\%$$

$$c(\text{H}_2\text{O}_2) = \frac{V(\text{Na}_2\text{S}_2\text{O}_2) \times c(\text{Na}_2\text{S}_2\text{O}_2) \times M(\text{H}_2\text{O}_2)}{2000 \times m(\text{H}_2\text{O}_2)} \times 100\%$$

Here,  $C_{\text{styrene}^*}$  was the initial concentration of styrene,  $C_{\text{styrene}}$  was the concentration of styrene at certain reacting times.  $C_{\text{epoxide}^*}$  was the theoretical concentration of styrene oxide, and  $C_{\text{epoxide}}$  was the real-time concentrations of styrene oxide at certain reacting times.  $M_{\text{styrene}^*}$  was the initial moles of styrene,  $M_{\text{styrene}}$  was the moles of styrene at certain reacting time,  $M_{\text{hydrogen peroxide}^*}$  was the initial moles of H<sub>2</sub>O<sub>2</sub>.  $V(\text{Na}_2\text{S}_2\text{O}_2)$ : volume of standard Na<sub>2</sub>S<sub>2</sub>O<sub>3</sub> solution (mL),  $c(\text{Na}_2\text{S}_2\text{O}_2)$ : molar concentration of standard Na<sub>2</sub>S<sub>2</sub>O<sub>3</sub> (mol/L),  $M(\text{H}_2\text{O}_2)$ : 34.01,  $m(\text{H}_2\text{O}_2)$ : mass of H<sub>2</sub>O<sub>2</sub>.

## 2.4 Catalyst recovering procedure

After the styrene epoxidation was completed, the emulsion suspension was centrifuged at rate of 8000 rpm for 5 min. The obtained yellow oil phase was dissolved in equal volume of acetonitrile, then the mixture was cooled to -10°C to generate solids. Styrene oxide can be obtained by removing acetonitrile using rotating evaporation. The raw solids were washed with acetonitrile for three times and dried under vacuum. The mass recovery yields of **Ph-PW<sub>2</sub>** and **Ph-P<sub>2</sub>W<sub>4</sub>** were 65% and 60%, respectively. Na<sub>2</sub>SO<sub>4</sub> can be recovered in water phase. The recovered catalysts and Na<sub>2</sub>SO<sub>4</sub> can be used in the next epoxidation reaction. Due to some mass loss of the catalysts, the recovered catalysts from previous identical reactions were combined and used in the subsequent catalytic run in the recycled reactions.

## 2. Additional Tables

**Table S1** Element analysis of Ph-PW<sub>2</sub> based on formula of [C<sub>16</sub>H<sub>33</sub>(CH<sub>3</sub>)<sub>3</sub>N]<sub>2</sub>[C<sub>6</sub>H<sub>5</sub>PO<sub>3</sub>{WO(O<sub>2</sub>)<sub>2</sub>}<sub>2</sub>]

| Element | Atomic number | Weight/% |
|---------|---------------|----------|
| N       | 1.90          | 2.12     |
| C       | 41.96         | 40.24    |
| H       | 87.10         | 7.01     |
| O       | 12.22         | 15.61    |
| P       | 1.18          | 2.91     |
| W       | 2.19          | 32.11    |

**Table S2** Condition setting during the reaction optimization of Ph-PW<sub>2</sub> catalyzed styrene epoxidation

| Optimized items          | Reaction conditions                                                                                                                                                                                                                                                                                                                                                                                                                                                                                                                                                                                                                                                                                                                                                                                                                                                                                                                                                                                                                      |
|--------------------------|------------------------------------------------------------------------------------------------------------------------------------------------------------------------------------------------------------------------------------------------------------------------------------------------------------------------------------------------------------------------------------------------------------------------------------------------------------------------------------------------------------------------------------------------------------------------------------------------------------------------------------------------------------------------------------------------------------------------------------------------------------------------------------------------------------------------------------------------------------------------------------------------------------------------------------------------------------------------------------------------------------------------------------------|
| Solvent-present in Fig.2 | Solvent optimization in Fig.2a<br>Reaction time optimization in Fig.2b<br>Reaction temperature optimization in Fig.2c<br>Catalyst dosage optimization in Fig.2d<br>Styrene concentration optimization in Fig.2e<br>Oxidant dosage optimization in Fig.2f                                                                                                                                                                                                                                                                                                                                                                                                                                                                                                                                                                                                                                                                                                                                                                                 |
|                          | 0.4 mmol Ph-PW <sub>2</sub> , 20 mmol styrene, 20 mmol H <sub>2</sub> O <sub>2</sub> , 6 mmol Na <sub>2</sub> SO <sub>4</sub> , 100 mmol solvent, 40°C, 21 h, 500 rpm<br>0.4 mmol Ph-PW <sub>2</sub> , 20 mmol styrene, 20 mmol H <sub>2</sub> O <sub>2</sub> , 6 mmol Na <sub>2</sub> SO <sub>4</sub> , 100 mmol CHCl <sub>3</sub> , 40°C, 500 rpm<br>0.4 mmol Ph-PW <sub>2</sub> , 20 mmol styrene, 20 mmol H <sub>2</sub> O <sub>2</sub> , 6 mmol Na <sub>2</sub> SO <sub>4</sub> , 100 mmol CHCl <sub>3</sub> , 10 h, 500 rpm<br>20 mmol styrene, 20 mmol H <sub>2</sub> O <sub>2</sub> , 6 mmol Na <sub>2</sub> SO <sub>4</sub> , 100 mmol CHCl <sub>3</sub> , 40°C, 10 h, 500 rpm<br>0.4 mmol Ph-PW <sub>2</sub> , 20 mmol styrene, 20 mmol H <sub>2</sub> O <sub>2</sub> , 6 mmol Na <sub>2</sub> SO <sub>4</sub> , 40°C, 10 h, 500 rpm<br>0.4 mmol Ph-PW <sub>2</sub> , 20 mmol styrene, 100 mmol CHCl <sub>3</sub> , 40°C, 10 h, 500 rpm, molar ratio of Na <sub>2</sub> SO <sub>4</sub> and H <sub>2</sub> O <sub>2</sub> 3:10 |
| Solvent-present in Fig.3 | Catalytic performances of recovered catalysts in five cycles in Fig. 3c                                                                                                                                                                                                                                                                                                                                                                                                                                                                                                                                                                                                                                                                                                                                                                                                                                                                                                                                                                  |
|                          | 0.4 mmol Ph-PW <sub>2</sub> , 20 mmol styrene, 30 mmol H <sub>2</sub> O <sub>2</sub> , 9 mmol Na <sub>2</sub> SO <sub>4</sub> , 100 mmol CHCl <sub>3</sub> , 10 h, 40°C, 500 rpm                                                                                                                                                                                                                                                                                                                                                                                                                                                                                                                                                                                                                                                                                                                                                                                                                                                         |
| Solvent-free in Fig.3    | Reaction temperature optimization in Fig.3a<br>Oxidant dosage optimization in Fig.3b<br>Catalytic stability in solvent-free system in Fig. 3d                                                                                                                                                                                                                                                                                                                                                                                                                                                                                                                                                                                                                                                                                                                                                                                                                                                                                            |
|                          | 0.4 mmol Ph-PW <sub>2</sub> , 20 mmol styrene, 10 mmol H <sub>2</sub> O <sub>2</sub> , 3 mmol Na <sub>2</sub> SO <sub>4</sub> , 2 h, 500 rpm<br>0.4 mmol Ph-PW <sub>2</sub> , 20 mmol styrene, 2 h, 40°C, 500 rpm, molar ratio of Na <sub>2</sub> SO <sub>4</sub> and H <sub>2</sub> O <sub>2</sub> 3:10<br>0.4 mmol Ph-PW <sub>2</sub> , 20 mmol styrene, 10 mmol H <sub>2</sub> O <sub>2</sub> , 3 mmol Na <sub>2</sub> SO <sub>4</sub> , 2 h, 40°C, 500 rpm                                                                                                                                                                                                                                                                                                                                                                                                                                                                                                                                                                           |

**Table S3** Catalytic performance comparison of styrene epoxidation with literatures

| Catalysts                                                                                                                                             | Oxidant/Solvent                                                  | $n_{\text{Oxidant}}:n_{\text{Styrene}}$ | Temperature<br>/time ( $^{\circ}\text{C}/\text{h}$ ) | Conversion/% | Selectivity/% | Ref.      |
|-------------------------------------------------------------------------------------------------------------------------------------------------------|------------------------------------------------------------------|-----------------------------------------|------------------------------------------------------|--------------|---------------|-----------|
| $[(\text{C}_8\text{H}_{17})_3\text{CH}_3\text{N}]_3[(\text{PO}_4)\{\text{WO}(\text{O}_2)_2\}_4]$                                                      | $\text{H}_2\text{O}_2/\text{none}$                               | 0.5:1                                   | 50/1                                                 | 50.0         | 93.0          | S3        |
| $[(\text{C}_{18}\text{H}_{37})_2(\text{CH}_3)_2\text{N}]_3[\text{SiO}_4\text{H}(\text{WO}_5)_3]$                                                      | $\text{H}_2\text{O}_2/\text{ethyl acetate}$                      | 0.2:1                                   | 60/3                                                 | 23.8         | 92.0          | S4        |
| $\{[(\text{C}_8\text{H}_{17})(\text{CH}_3)_2\text{N}]_2(\text{CH}_2)_3\}_{1.5}\{\text{PO}_4[\text{WO}(\text{O}_2)_2]_4\}$                             | $\text{H}_2\text{O}_2/\text{CH}_3\text{CN}$                      | 0.5:1                                   | 35/20                                                | 37.9         | 86.6          | S5        |
| $[(\text{C}_{18}\text{H}_{37})_2(\text{CH}_3)_2\text{N}]_7[\text{PW}_{11}\text{O}_{39}]$                                                              | $\text{H}_2\text{O}_2/\text{ethyl acetate}$                      | 3:1                                     | 85/1                                                 | 90.1         | 90.5          | S6        |
| $\text{H}_3\text{PW}_{12}\text{O}_{40}$                                                                                                               | $\text{H}_2\text{O}_2/\text{isooctane-}$<br>$\text{H}_2\text{O}$ | 2:1                                     | 70/8                                                 | 78.0         | 74.0          | S7        |
| $\text{PMo}\subset\text{Mo}_{72}\text{Fe}_{30}$                                                                                                       | $\text{H}_2\text{O}_2/\text{H}_2\text{O}$                        | 0.4:1                                   | 25/5                                                 | 33.4         | 99.0          | S8        |
| $\text{Cs}_7[\text{PW}_{10}\text{Cu}_2(\text{H}_2\text{O})\text{O}_{38}]$                                                                             | TBHP/none                                                        | 1.5:1                                   | 60/8                                                 | 77.9         | 51.6          | S9        |
| $[\text{Cu}(\text{en})_2]_2[\text{Cu}(\text{en})_2(\text{H}_2\text{O})_2]_4[\text{SiNb}_{12}\text{V}_2\text{O}_{42}] \cdot 7\text{H}_2\text{O}$       | TBHP/ $\text{CH}_3\text{CN}$                                     | 2:1                                     | 80/4                                                 | 82.1         | 48.6          | S10       |
| $\text{C}_{60}\text{H}_{54}\text{Cu}_6\text{N}_{12}\text{O}_{77}\text{P}_2\text{W}_{18}$                                                              | TBHP/ $\text{CH}_3\text{CN}$                                     | 2:1                                     | 80/8                                                 | 95.9         | 86.0          | S11       |
| $[\text{Cu}_2(4,4'\text{-bipy})_3(\text{H}_2\text{O})_2(\mu_2\text{-OH})_2(\text{H}_4\text{PMo}_9\text{V}_3\text{O}_{40})] \cdot 4\text{H}_2\text{O}$ | $\text{O}_2/\text{CH}_3\text{CN}$                                | /                                       | 35/4                                                 | 100.0        | 70.9          | S12       |
| $[\text{Co}_2(\text{H}_2\text{O})_4(\text{BBTZ})_3][\text{HPW}_{10}\text{V}_2\text{O}_{40}]$                                                          | $\text{O}_2/\text{CH}_3\text{CN}$                                | /                                       | 25/4                                                 | 89           | 70            | S13       |
| $\text{WO}(\text{O}_2)_2(2,2'\text{-bpy})$                                                                                                            | $\text{H}_2\text{O}_2/\text{CH}_3\text{CN}$                      | 1.7:1                                   | 70/24                                                | 76.0         | 40.0          | S14       |
| Ph-PW <sub>2</sub>                                                                                                                                    | $\text{H}_2\text{O}_2/\text{CHCl}_3$                             | 1.5:1                                   | 40/10                                                | 92.8         | 92.5          | This work |
| Ph-PW <sub>2</sub>                                                                                                                                    | $\text{H}_2\text{O}_2/\text{none}$                               | 0.5:1                                   | 40/2                                                 | 93.4         | 94.5          | This work |
| Ph-P <sub>2</sub> W <sub>4</sub>                                                                                                                      | $\text{H}_2\text{O}_2/\text{CHCl}_3$                             | 1.5:1                                   | 40/6                                                 | 93.9         | 95.5          | This work |

**Table S4** P and W elemental analysis of aqueous/organic phases for Ph-PW<sub>2</sub> after reaction

| Element | Relative content/<br>wt% | absolute content/<br>g | relative content/<br>wt% | absolute content/<br>g |
|---------|--------------------------|------------------------|--------------------------|------------------------|
|---------|--------------------------|------------------------|--------------------------|------------------------|

|   | aqueous phase |         | organic phase |       |
|---|---------------|---------|---------------|-------|
| P | 2.34          | 0.00073 | 96.33         | 0.029 |
| W | 2.52          | 0.0093  | 96.66         | 0.36  |

Reaction conditions: 1 mmol **Ph-PW<sub>2</sub>**, 50 mmol styrene, 75 mmol H<sub>2</sub>O<sub>2</sub>, 22 mmol Na<sub>2</sub>SO<sub>4</sub>, 250 mmol CHCl<sub>3</sub>, 10 h, 40°C, 500 rpm

**Table S5** Catalytic epoxidation of different olefins to the corresponding epoxides by Ph-PW<sub>2</sub> and Ph-P<sub>2</sub>W<sub>4</sub>

| Entry | Substrate                                                                         | Product                                                                           | Time/<br>h | Conv. in<br>% <sup>a,b</sup> | Sel. in % <sup>a,b</sup> |
|-------|-----------------------------------------------------------------------------------|-----------------------------------------------------------------------------------|------------|------------------------------|--------------------------|
| 1     |  |  | 2/2        | 95.0/95.1                    | 94.8/99.0                |
| 2     |  |  | 2/2        | 96.8/97.0                    | 98.5/98.7                |
| 3     |  |  | 21/21      | 89.4/92.1                    | 93.8/94.2                |
| 4     |  |  | 4/3        | 87.8/92.3                    | 89.1/86.1                |

<sup>a</sup>: Catalyst: **Ph-PW<sub>2</sub>**, 20 mmol alkene, 20 mmol H<sub>2</sub>O<sub>2</sub>, 6 mmol Na<sub>2</sub>SO<sub>4</sub>, 0.4 mmol Ph-PW<sub>2</sub>, 40°C, 500 rpm, without solvent; <sup>b</sup>: Catalyst: **Ph-P<sub>2</sub>W<sub>4</sub>**, 20 mmol alkene, 20 mmol H<sub>2</sub>O<sub>2</sub>, 6 mmol Na<sub>2</sub>SO<sub>4</sub>, 0.2 mmol Ph-P<sub>2</sub>W<sub>4</sub>, 40°C, 500 rpm, 70 mmol CHCl<sub>3</sub>.

**Table S6** Element analysis of Ph-P<sub>2</sub>W<sub>4</sub> based on formula of [C<sub>16</sub>H<sub>33</sub>(CH<sub>3</sub>)<sub>3</sub>N]<sub>4</sub>[C<sub>8</sub>H<sub>8</sub>(PO<sub>3</sub>)<sub>2</sub>{WO(O<sub>2</sub>)<sub>2</sub>}<sub>4</sub>]

| Element | Atomic number | Weight/% |
|---------|---------------|----------|
| N       | 4.65          | 2.65     |
| C       | 83.65         | 40.88    |
| H       | 184.91        | 7.53     |
| O       | 26.36         | 17.16    |
| P       | 1.84          | 2.33     |
| W       | 3.93          | 29.45    |

**Table S7** Condition setting during the reaction optimization of **Ph-P<sub>2</sub>W<sub>4</sub>** catalyzed styrene epoxidation reaction

| Optimized items                                                        | Reaction conditions                                                                                                                                                                          |
|------------------------------------------------------------------------|----------------------------------------------------------------------------------------------------------------------------------------------------------------------------------------------|
| Catalytic performance of recovered catalysts in five cycles in Fig. 4e | 0.2 mmol Ph-P <sub>2</sub> W <sub>4</sub> , 20 mmol styrene, 30 mmol H <sub>2</sub> O <sub>2</sub> , 9 mmol Na <sub>2</sub> SO <sub>4</sub> , 70 mmol CHCl <sub>3</sub> , 6 h, 40°C, 500 rpm |
| Catalytic stability in solvent-free system in Fig. 4f                  | 0.2 mmol Ph-P <sub>2</sub> W <sub>4</sub> , 20 mmol styrene, 12 mmol H <sub>2</sub> O <sub>2</sub> , 3.6 mmol Na <sub>2</sub> SO <sub>4</sub> , 2 h, 40°C, 500 rpm                           |
| Optimization of reaction time in Fig. S6a                              | 0.2 mmol Ph-P <sub>2</sub> W <sub>4</sub> , 20 mmol styrene, 30 mmol H <sub>2</sub> O <sub>2</sub> , 9 mmol Na <sub>2</sub> SO <sub>4</sub> , 70 mmol CHCl <sub>3</sub> , 40°C, 500 rpm      |

|                                                  |                                                                                                                                                                                                     |
|--------------------------------------------------|-----------------------------------------------------------------------------------------------------------------------------------------------------------------------------------------------------|
| Optimization of reaction temperature<br>Fig. S6b | 0.2 mmol Ph-P <sub>2</sub> W <sub>4</sub> , 20 mmol styrene, 20 mmol H <sub>2</sub> O <sub>2</sub> , 6mmol Na <sub>2</sub> SO <sub>4</sub> , 70 mmol CHCl <sub>3</sub> , 6 h, 500 rpm               |
| Optimization of oxidant dosage in Fig. S6c       | 0.2 mmol Ph-P <sub>2</sub> W <sub>4</sub> , 20 mmol styrene, 70 mmol CHCl <sub>3</sub> , 40°C, 6 h, 500 rpm, molar ratio of Na <sub>2</sub> SO <sub>4</sub> and H <sub>2</sub> O <sub>2</sub> 3:10; |
| Optimization of catalyst dosage Fig. S6d         | 20 mmol styrene, 30 mmol H <sub>2</sub> O <sub>2</sub> , 9 mmol Na <sub>2</sub> SO <sub>4</sub> , 70 mmol CHCl <sub>3</sub> , 40°C, 6 h, 500 rpm                                                    |

### 3. Additional Figures

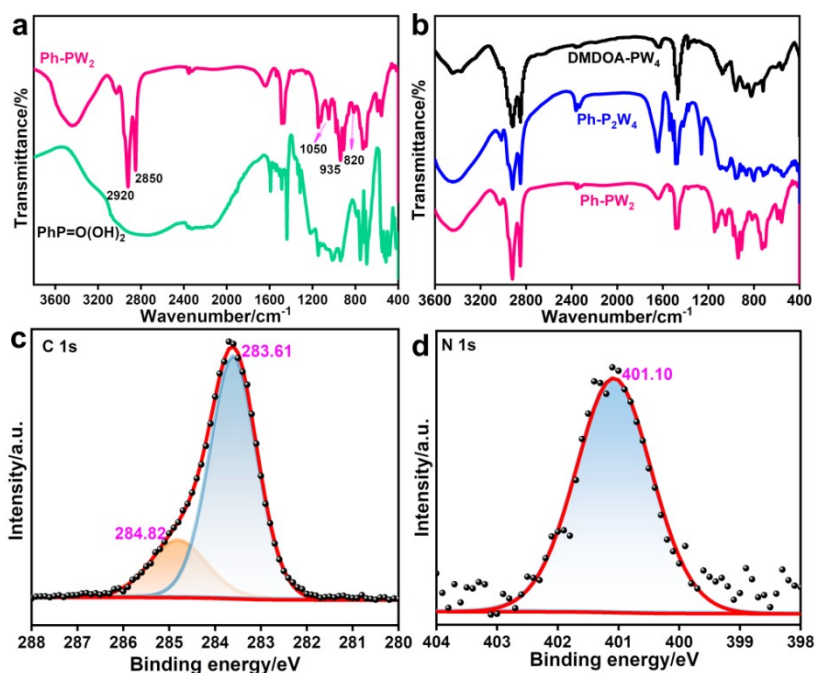

**Fig. S1.** (a) FT-IR spectra of Ph-PW<sub>2</sub> catalyst and organic ligand; (b) FT-IR spectra of three catalysts in this work; (c) high-resolution XPS C 1s spectrum; (d) N 1s XPS spectrum

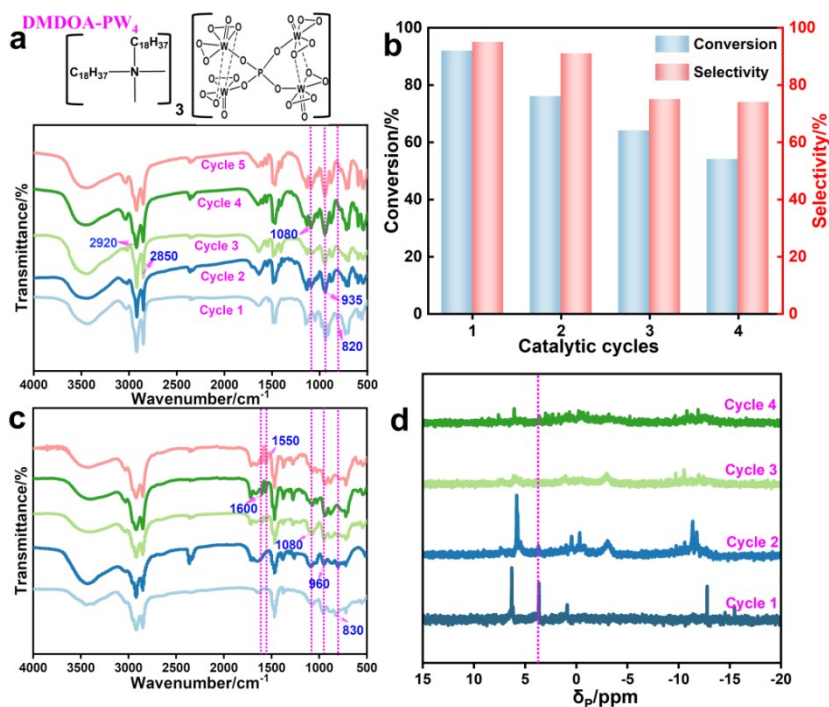

**Fig. S2.** (a) FT-IR spectra of recovered catalysts in five catalytic cycles together with structure of **DMDOA-PW<sub>4</sub>**; (b) catalytic performances of recovered **DMDOA-PW<sub>4</sub>** catalyst in four cycle (reaction condition: 0.2 mmol DMDOA-PW<sub>4</sub>, 20 mmol styrene, 10 mmol H<sub>2</sub>O<sub>2</sub>, 3 mmol Na<sub>2</sub>SO<sub>4</sub>, 2 h, 30°C, 500 rpm); (c, d) FT-IR and <sup>31</sup>P NMR spectra of recovered **DMDOA-PW<sub>4</sub>** catalyst in four cycles

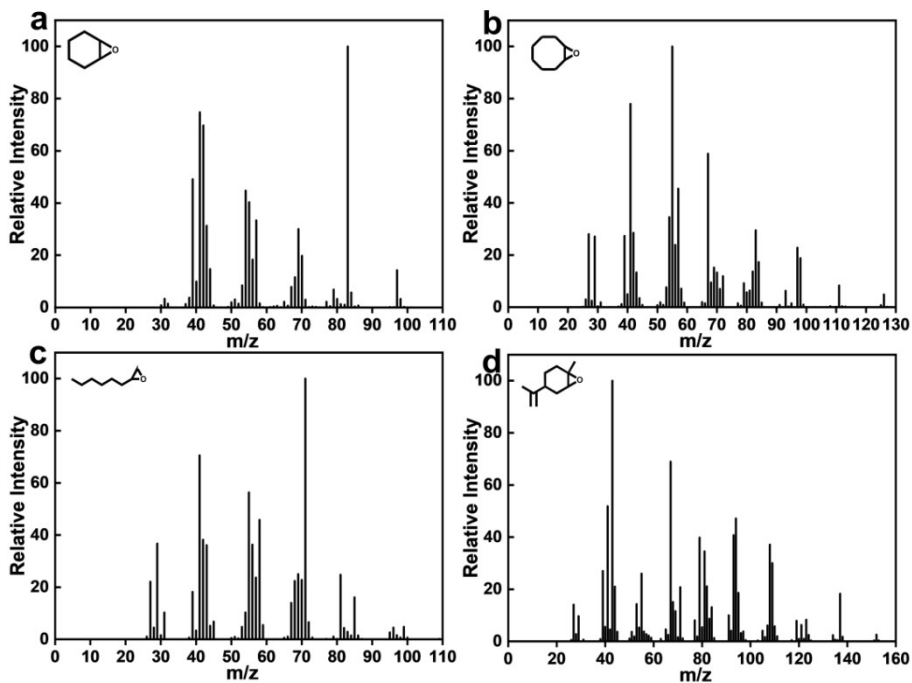

**Fig. S3.** Mass spectra of epoxide products in substrate scope under **Ph-PW<sub>2</sub>** catalyst: (a) cyclohexene epoxide; (b),2-epoxyoctane; (c) 1,2-epoxyoctane; (d) limonene epoxide

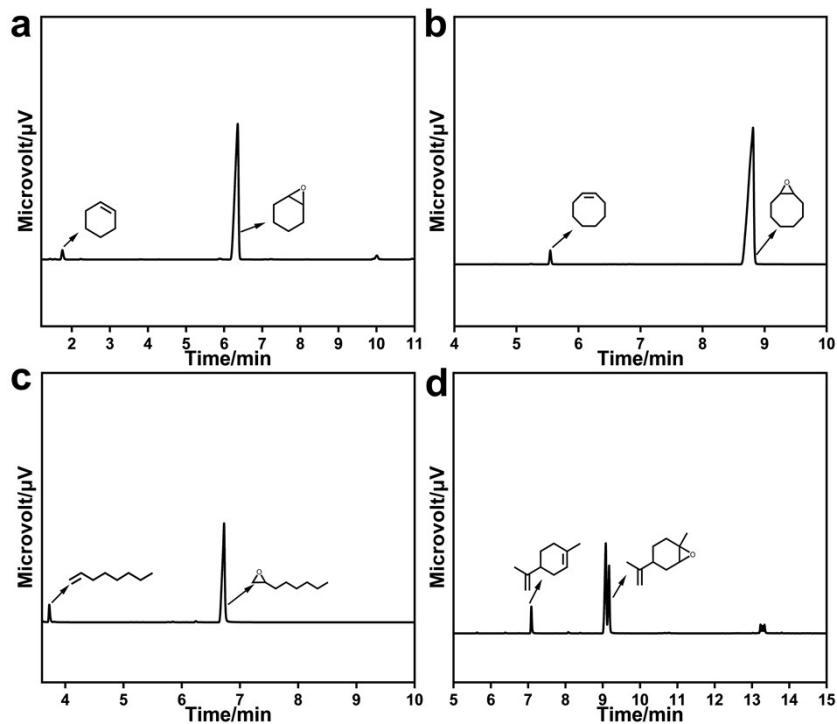

**Fig. S4.** GC of epoxide products in substrate scope under **Ph-PW<sub>2</sub>** catalyst: (a) cyclohexene epoxide; (b), 2-epoxyoctane; (c) 1,2-epoxyoctane; (d) limonene epoxide

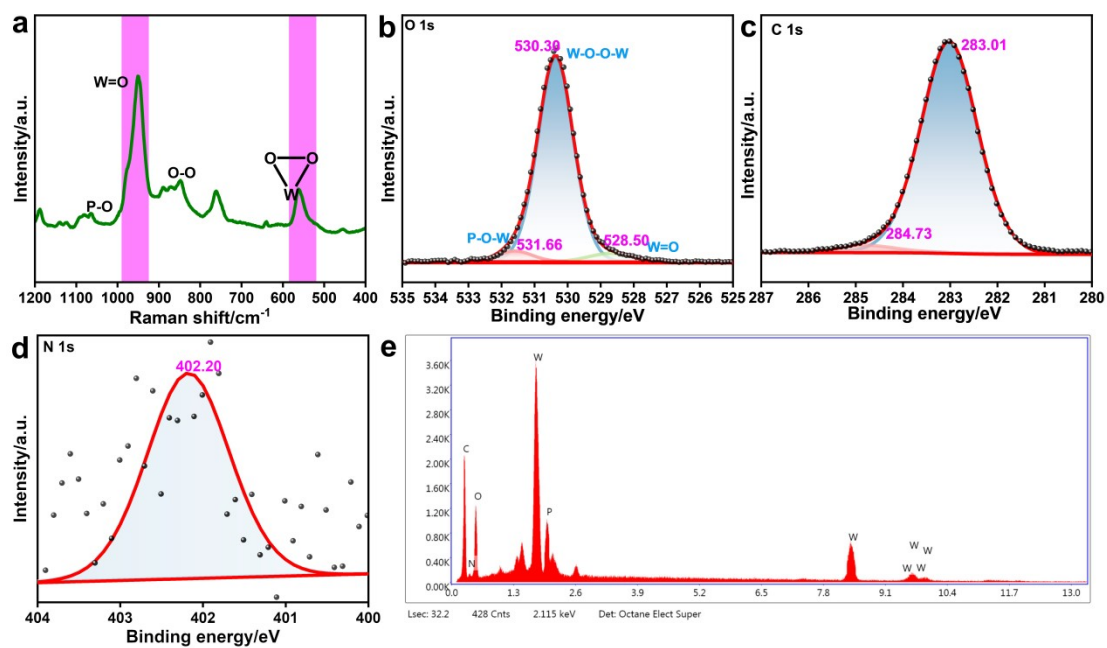

**Fig. S5.** Characterizations of **Ph-P<sub>2</sub>W<sub>4</sub>**: (a) Raman spectrum; high-resolution XPS spectra: (b) O 1s; (c) C 1s; (d) N 1s; (e) EDS spectrum

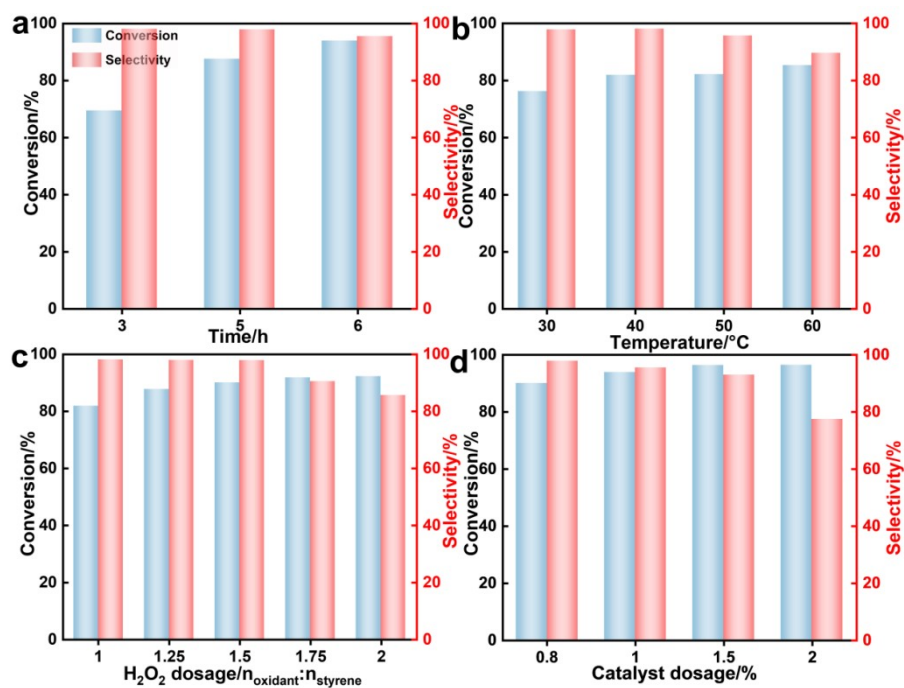

**Fig. S6.** Catalytic reaction optimization of **Ph-P<sub>2</sub>W<sub>4</sub>** on styrene epoxidation: (a) reaction time; (b) reaction temperature; (c) oxidant dosage; (d) catalyst dosage

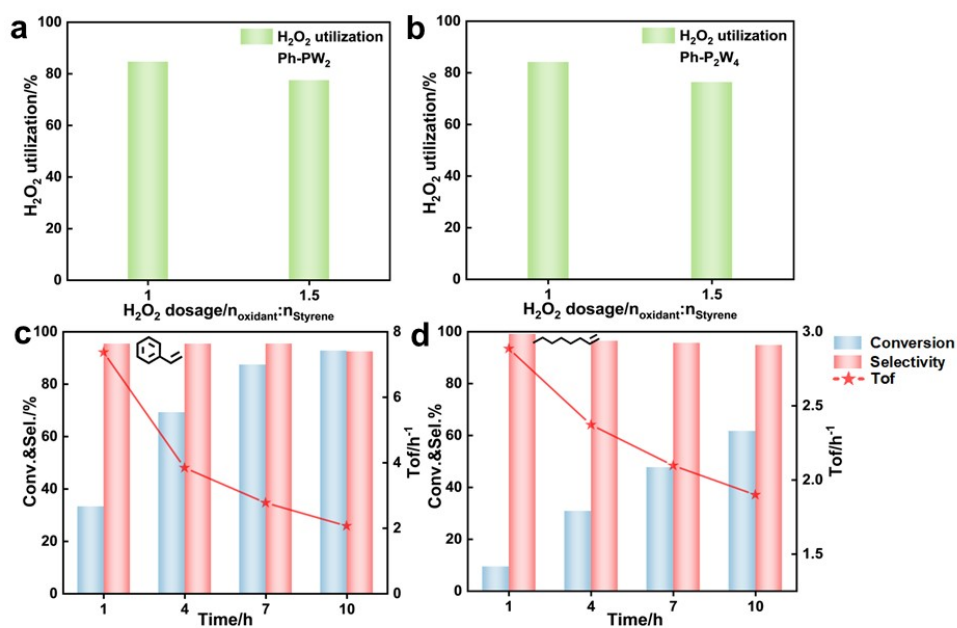

**Fig. S7.** H<sub>2</sub>O<sub>2</sub> utilization efficiency: (a) **Ph-PW<sub>2</sub>** and **Ph-P<sub>2</sub>W<sub>4</sub>** (reaction conditions correspond to the optimal parameters for **Ph-PW<sub>2</sub>** and **Ph-P<sub>2</sub>W<sub>4</sub>**); TOF comparison (c) styrene and (d) 1-octene (reaction conditions: 0.4 mmol **Ph-PW<sub>2</sub>**, 20 mmol styrene or 1-octene, 30 mmol H<sub>2</sub>O<sub>2</sub>, 9 mmol Na<sub>2</sub>SO<sub>4</sub>, 100 mmol CHCl<sub>3</sub>, 10 h, 40 °C, 500 rpm).

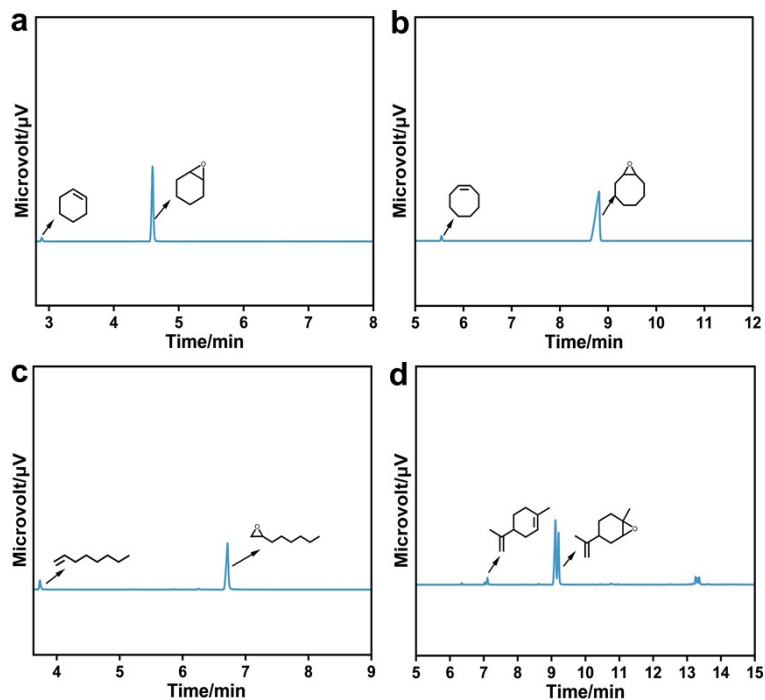

**Fig. S8.** Catalytic performance of **Ph-P<sub>2</sub>W<sub>4</sub>** and its substrate scope judged from GC: (a) cyclohexene epoxide; (b) 2-epoxyoctane; (c) 1,2-epoxyoctane; (d) limonene epoxide

## References

- S1 G. S. Girolami and A. P. Sattelberger, *Inorg. Synth.*, 2014, **36**, 147.
- S2 W. B. Cunningham, J. D. Tibbetts, M. Hutchby, K. A. Maltby, M. G. Davidson, U. Hintermair, P. Plucinski and S. D. Bull, *Green Chem.*, 2020, **22**, 513–524.
- S3 Q. N. Xiao, Y. Y. Jiang, W. Q. Yuan, J. J. Chen, H. H. Li and H. D. Zheng, *Chin. J. Chem. Eng.*, 2022, **55**, 192–201.
- S4 B. C. Ma, W. Zhao, F. M. Zhang, Y. S. Zhang, S. Y. Wu and Y. Dong, *RSC Adv.*, 2014, **4**, 32054–32062.
- S5 Z. J. Zhang, Q. Y. Zha, Y. Liu, Z. B. Zhang, J. Liu and Z. Zhou, *Chin. J. Chem. Eng.*, 2023, **58**, 146–154.
- S6 Y. X. Wu, Z. Chen, Y. D. Wang and J. H. Xu, *Ind. Eng. Chem. Res.*, 2022, **61**, 10747–10755.
- S7 A. G. Sathicq, L. R. Pizzio, P. G. Vázquez, P. Tundo, F. Aricò and G. P. Romanelli, *Sustainable Chem. Pharm.*, 2020, **15**, 100201.
- S8 R. Fareghi-Alamdari, S. M. Hafshejani, H. Taghiyar, B. Yadollahi and M. R. Farsani, *Catal. Commun.*, 2016, **78**, 64–67.

- S9 R. Sadasivan, A. Patel and A. Ballabh, *Inorg. Chim. Acta*, 2019, **487**, 345–353.
- S10 T. T. Zhang and X. B. Cui, *Polyhedron*, 2023, **243**, 116532.
- S11 Y. Liu, X. Zhang, X. B. Cui and J. Q. Xu, *Inorg. Chem.*, 2018, **57**, 11123–11134.
- S12 Y. F. Liu, X. Bai, Y. X. Zhang, M. C. Zhu, B. Li and S. X. Liu, *Inorg. Chem. Commun.*, 2025, **176**, 114172.
- S13 C. Y. Sun, Y. X. Zhang, M. C. Zhu, Y. F. Liu, A. G. Zhang, S. Y. Wang, Y. Liu and S. X. Liu, *Inorg. Chim. Acta*, 2026, **589**, 122881.
- S14 T. R. Amarante, M. M. Antunes, A. A. Valente, F. A. Almeida Paz, M. Pillinger and I. S. Gonçalves, *Inorg. Chem.*, 2015, **54**, 9690–9703.
